# Supplementary material
Source: PubMed Central journal article supplement (PMC1142364)

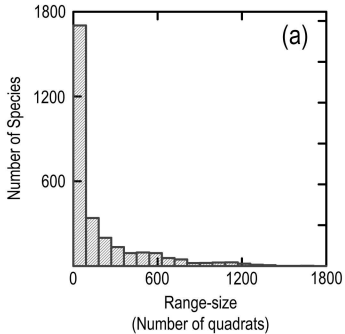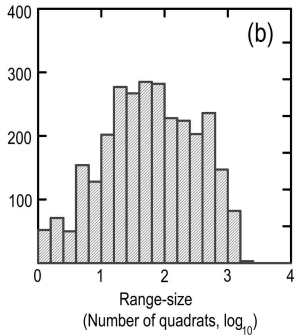

Supplement: pnas_0500424102_1.pdf [file pnas_0500424102_1.pdf]
